# Supplementary material for: Lithium intercalation in the surface region of an LiNi1/3Mn1/3Co1/3O2 cathode through different crystal planes
Source: Royal Society of Chemistry journal article supplement (doi:10.1039/c6ra17390j), 2016-01-01
Supplement: c6ra17390j1.pdf [file c6ra17390j1.pdf]

## Supplemental information for:

# Lithium intercalation in the surface region of an $\text{LiNi}_{1/3}\text{Mn}_{1/3}\text{Co}_{1/3}\text{O}_2$ cathode through different crystal planes

Masaaki HIRAYAMA,<sup>a,\*</sup> Machiko ABE<sup>a,b</sup>, Sou TAMINATO<sup>a</sup>, Yuya ARAKI<sup>a</sup>, Kota SUZUKI<sup>a</sup> and Ryoji KANNO<sup>a</sup>

<sup>a</sup> Department of Chemical Science and Engineering, School of Materials and Chemical Technology, Tokyo Institute of Technology, 4259 Nagatsuta, Midori-ku, Yokohama 226-8502, Japan

<sup>b</sup> Battery Evaluation & Analysis Dept., Battery Material Engineering & Research Div., Toyota Motor Corporation, 1 Toyota, Aichi, 471-8572, Japan

## 1. Refined parameters of XRR analysis

**Table S1** Structural parameters of the  $\text{LiNi}_{1/3}\text{Co}_{1/3}\text{Mn}_{1/3}\text{O}_2$  films refined by XRR analyses.

(a) (1-18) film

| layer                                                       | Thickness [nm] | SLD [ $\text{nm}^{-2}$ ]      | Roughness [nm] |
|-------------------------------------------------------------|----------------|-------------------------------|----------------|
| $\text{LiNi}_{1/3}\text{Co}_{1/3}\text{Mn}_{1/3}\text{O}_2$ | 25.0           | $3.78 \times 10^{-3}$         | 2.2            |
| $\text{SrRuO}_3$                                            | 28.4           | $4.73 \times 10^{-3}$         | 2.8            |
| $\text{Nb:SrTiO}_3$                                         | -              | $3.97 \times 10^{-3}$ [fixed] | 1.2            |

(b) (104) film

| layer                                                       | Thickness [nm] | SLD [ $\text{nm}^{-2}$ ]      | Roughness [nm] |
|-------------------------------------------------------------|----------------|-------------------------------|----------------|
| $\text{LiNi}_{1/3}\text{Co}_{1/3}\text{Mn}_{1/3}\text{O}_2$ | 23.4           | $3.76 \times 10^{-3}$         | 1.8            |
| $\text{SrRuO}_3$                                            | 26.4           | $4.78 \times 10^{-3}$         | 1.8            |
| $\text{Nb:SrTiO}_3$                                         | -              | $3.97 \times 10^{-3}$ [fixed] | 1.3            |

(c) (003) film

| layer                                                       | Thickness [nm] | SLD [ $\text{nm}^{-2}$ ]      | Roughness [nm] |
|-------------------------------------------------------------|----------------|-------------------------------|----------------|
| $\text{LiNi}_{1/3}\text{Co}_{1/3}\text{Mn}_{1/3}\text{O}_2$ | 29.1           | $3.78 \times 10^{-3}$         | 2.3            |
| $\text{SrRuO}_3$                                            | 33.7           | $4.73 \times 10^{-3}$         | 1.0            |
| $\text{Nb:SrTiO}_3$                                         | -              | $3.97 \times 10^{-3}$ [fixed] | 2.1            |

## 2. AFM image of the $\text{LiNi}_{1/3}\text{Co}_{1/3}\text{Mn}_{1/3}\text{O}_2(003)$ surface

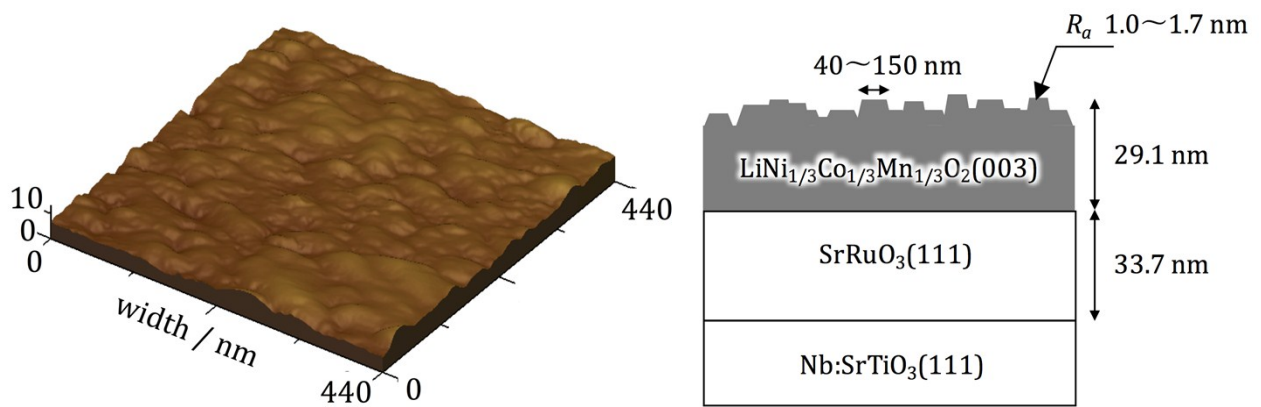

**Figure S1** AFM image and schematic of the  $\text{LiNi}_{1/3}\text{Co}_{1/3}\text{Mn}_{1/3}\text{O}_2(003)$  film synthesized on  $\text{SrRuO}_3/\text{Nb:SrTiO}_3(111)$ . The thicknesses were refined by XRR. The surface morphology and roughness of the film was investigated by atomic force microscopy (AFM, JEOL, JSPM-5200).
